# Supplementary material
Source: publisher figshare collection journal article supplement (https://acs.figshare.com/ndownloader/files/3945304)
Supplement: Supplementary file 1 [file 3945304]

## SUPPORTING INFORMATION

### A General Strategy for Zero-Valent Intercalation into Two-Dimensional Layered Nanomaterials

Janina P. Motter,<sup>†</sup> Kristie J. Koski,<sup>‡</sup> and Yi Cui<sup>\*,†,§</sup>

<sup>†</sup> Department of Materials Science and Engineering, Stanford University, Stanford, California, 94305, United States

<sup>‡</sup> Department of Chemistry, Brown University, Providence, Rhode Island, 02912, United States

<sup>§</sup>SLAC National Accelerator Laboratory, Stanford Institute for Materials and Energy Sciences, 2575 Sand Hill Road, Menlo Park, California, 94025, United States

#### Energy Dispersive X-Ray Spectroscopy: Evidence of Copper Intercalation

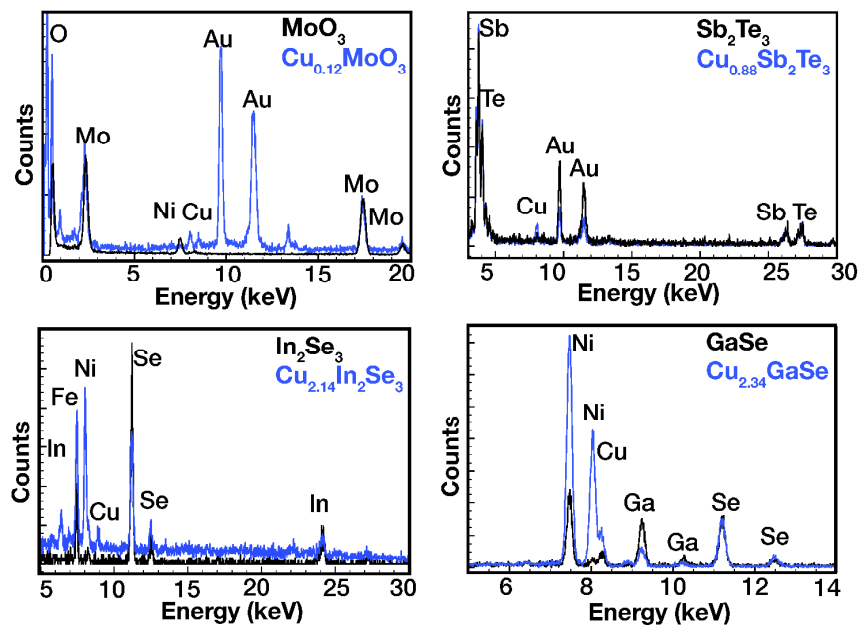

**Figure S1.** Full EDX spectra for each material before and after intercalation. Au or Ni TEM grids are used and show up in the EDX spectra. Additional Fe peaks are from the sample holder.

### Selected Area Electron Diffraction Patterns: Superlattice Intercalant Ordering

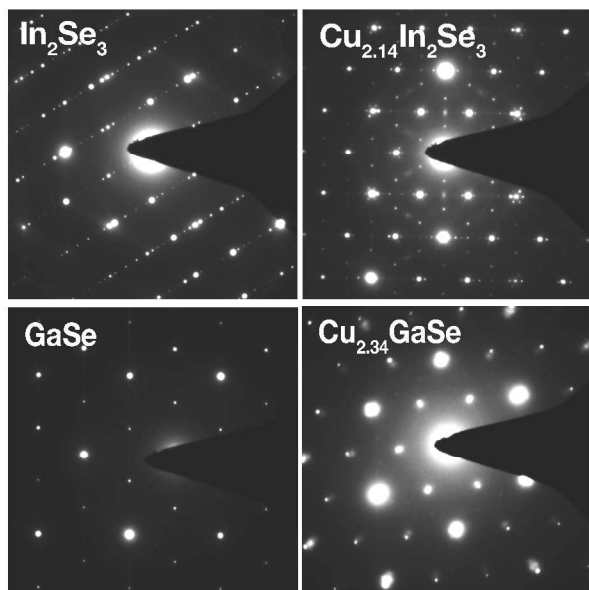

**Figure S2.** Superlattice patterns for  $\text{In}_2\text{Se}_3$  and  $\text{GaSe}$  indicative of hexagonal ordering from high densities of intercalated zero-valent copper.
